# Supplementary material for: Structural dependence of the microwave dielectric properties of Cr3+-substituted ZnGa2O4spinel ceramics: crystal distortion and vibration mode studies
Source: Royal Society of Chemistry journal article supplement (doi:10.1039/c9tc01959f), 2019-01-01
Supplement: c9tc01959f1.pdf [file c9tc01959f1.pdf]

# Structural dependence of microwave dielectric properties of Cr<sup>3+</sup>-substituted ZnGa<sub>2</sub>O<sub>4</sub> spinel ceramics: crystal distortion and vibration modes study

Xiaochi Lu,<sup>a,b,c</sup> Zehui Du,<sup>e,\*</sup> Bin Quan,<sup>c,d</sup> Wenjie Bian,<sup>a,b</sup> Haikui Zhu,<sup>a,b</sup> Qitu Zhang<sup>a,b,\*</sup>

<sup>a</sup>College of Materials Science and Engineering, Nanjing Tech University, Nanjing, China

<sup>b</sup>Jiangsu Collaborative Innovation Center for Advanced Inorganic Function Composites, Nanjing, China

<sup>c</sup>School of Materials Science and Engineering, Nanyang Technological University, 639798, Singapore

<sup>d</sup>College of Materials Science and Technology, Nanjing University of Aeronautics and Astronautics, Nanjing 211100, China

<sup>e</sup>Temasek Laboratories, Nanyang Technological University, 637553, Singapore

\*Corresponding Author,  
Prof. Dr. Qitu Zhang.  
Tel.: +86-025-83587246; E-mail: ngdzqt@163.com

\*Co-corresponding Author,  
Dr. Zehui Du.  
Tel.: +65-97507669, E-mail: duzehui@e.ntu.edu.sg

**Table S1.** List of refined bond angle (°) of Cr-ZGO sintered at 1400 °C for 2h.

| n  | O-Zn-O | O-Ga-O<br>O-Cr-O | O-Ga-O<br>O-Cr-O | O-Ga-O<br>O-Cr-O | Zn-O-Ga<br>Zn-O-Cr | Ga-O-Ga<br>Cr-O-Cr | Ga-O-Cr | Ga-O-Cr |
|----|--------|------------------|------------------|------------------|--------------------|--------------------|---------|---------|
| 0  | 109.47 | 84.300           | 180.000          | 95.700           | 121.320            | 95.430             | /       | /       |
| 1  | 109.47 | 85.064           | 180.000          | 94.936           | 121.842            | 94.731             | 94.731  | 0       |
| 5  | 109.47 | 86.032           | 180.000          | 93.968           | 122.503            | 93.835             | 93.835  | 0       |
| 10 | 109.47 | 86.548           | 180.000          | 93.452           | 122.858            | 93.351             | 93.351  | 0       |
| 15 | 109.47 | 86.327           | 180.000          | 93.673           | 122.706            | 93.559             | 93.559  | 0       |

**Table S2.** List of refined bond length (Å) of Cr-ZGO sintered at 1400 °C for 2h.

| n  | O-Zn    | Ga-Ga   | O-Ga    | Ga-Cr   | Cr-Cr   | O-Cr    |
|----|---------|---------|---------|---------|---------|---------|
| 0  | 1.9718  | 2.94628 | 1.9913  | /       | /       | /       |
| 1  | 1.95067 | 2.94638 | 2.00246 | 2.94638 | 2.94638 | 2.00246 |
| 5  | 1.92332 | 2.94644 | 2.01709 | 2.94644 | 2.94644 | 2.01709 |
| 10 | 1.90817 | 2.94598 | 2.02479 | 2.94598 | 2.94598 | 2.02479 |
| 15 | 1.9149  | 2.94654 | 2.02172 | 2.94654 | 2.94654 | 2.02174 |

**Table S3.** List of  $T_{2g}$  mode parameters (frequency, and FWHM) from Raman analysis, dielectric loss ( $\tan\delta$ ) and dielectric constant ( $\epsilon_r$ ) of Cr-ZGO.

| Cr content\Raman position | T2g   | FWHM T2g | $\tan\delta$ (*10-5) | $\epsilon_r$ |
|---------------------------|-------|----------|----------------------|--------------|
| 0                         | 606.5 | 17.4     | 19                   | 9.77         |
| 1                         | 607.8 | 14.43    | 8.87                 | 9.88         |
| 5                         | 608.8 | 15.2     | 11.75                | 9.99         |
| 10                        | 610   | 18.7     | 13.18                | 10.08        |
| 15                        | 610.6 | 16.4     | 12.95                | 10.19        |
